# Supplementary material
Source: HighWire-hosted journal article supplement (https://www.highwirestage.com/highwire/filestream/111912/field_highwire_adjunct_files/0/0792.pdf)
Supplement: 0792.pdf [file 0792.pdf]

Online Supplemental Data: Bivariate analysis comparing patients with incidental brain aneurysms on screening MRA with those who didn't

| Characteristics         | Full Sample<br>(N=24397) | No Incidental<br>Aneurysm<br>(N=22313) | Incidental<br>Aneurysm<br>(N=2084) | P Value          |
|-------------------------|--------------------------|----------------------------------------|------------------------------------|------------------|
| Sex, N (%)              |                          |                                        |                                    | <b>&lt;0.001</b> |
| Female                  | 14862 (60.9%)            | 13463 (60.3%)                          | 1399 (67.1%)                       |                  |
| Male                    | 9535 (39.1%)             | 8850 (39.7%)                           | 685 (32.9%)                        |                  |
| Age                     |                          |                                        |                                    | <b>&lt;0.001</b> |
| Mean $\pm$ SD           | 60.4 $\pm$ 17.4          | 60 $\pm$ 17.6                          | 64 $\pm$ 15.4                      |                  |
| Median (IQR)            | 62 (49, 73)              | 61 (49, 73)                            | 65 (54, 76)                        |                  |
| Race & Ethnicity, N (%) |                          |                                        |                                    | <b>0.045</b>     |
| Non-Hispanic White      | 2953 (12.1%)             | 2727 (12.2%)                           | 226 (10.8%)                        | 0.071            |
| Non-Hispanic Black      | 8194 (33.6%)             | 7503 (33.6%)                           | 691 (33.2%)                        | 0.683            |
| Hispanic                | 8758 (35.9%)             | 7953 (35.6%)                           | 805 (38.6%)                        | <b>0.007</b>     |
| Other                   | 3798 (15.6%)             | 3497 (15.7%)                           | 301 (14.4%)                        | 0.147            |
| Unknown                 | 694 (2.8%)               | 633 (2.8%)                             | 61 (2.9%)                          | 0.867            |
| Constipation, N (%)     | 3946 (16.2%)             | 3572 (16.0%)                           | 374 (17.9%)                        | <b>0.023</b>     |
| Renal Disease, N (%)    | 5508 (22.6%)             | 5028 (22.5%)                           | 480 (23.0%)                        | 0.622            |
| ADPCKD, N (%)           | 60 (0.2%)                | 55 (0.2%)                              | 5 (0.2%)                           | 1.000            |
| HTN, N (%)              | 16336 (67.0%)            | 14833 (66.5%)                          | 1503 (72.1%)                       | <b>&lt;0.001</b> |
| Hyperlipidemia, N (%)   | 11162 (45.8%)            | 10123 (45.4%)                          | 1039 (49.9%)                       | <b>&lt;0.001</b> |
| Cocaine Use, N (%)      | 431 (1.8%)               | 397 (1.8%)                             | 34 (1.6%)                          | 0.687            |

|                        |              |              |             |       |
|------------------------|--------------|--------------|-------------|-------|
| Alcohol Use, N (%)     | 792 (3.2%)   | 724 (3.2%)   | 68 (3.3%)   | 1.000 |
| Smoking History, N (%) | 5058 (20.7%) | 4594 (20.6%) | 464 (22.3%) | 0.076 |

ADPCKD – Autosomal Dominant Polycystic Kidney Disease, HTN – Hypertension, IQR –

Interquartile Range, SD – Standard Deviation
